# Supplementary material for: Chapter 5: Network Biology Approach to Complex Diseases
Source: PLoS Comput Biol. 2012 Dec 27;8(12):e1002820. doi: 10.1371/journal.pcbi.1002820 (PMC3531284; doi:10.1371/journal.pcbi.1002820)
Supplement: Text S1 — Answers to Exercises. (PDF) [file pcbi.1002820.s001.pdf]

# Network Biology Approach to Complex Diseases

## Answers to exercises

Dong-Yeon Cho<sup>1</sup>, Yoo-Ah Kim<sup>1</sup>, Teresa M. Przytycka\*

1. Construct coexpression networks [98]
  - a. Download the three expression datasets from the following page:  
<http://www.geneticsofgeneexpression.org/network/download>  
There are 3 files which contain expression levels for 3 different populations.
  - b. Compute 3 population-specific correlations for each pair of the 4238 genes with expression data.  
(Hint: There are 8,978,203 pairs.)  
For each population, the Pearson correlation coefficient between every pair of genes ( $x, y$ ) can be calculated as follows:
$$r_{xy} = \frac{n \sum x_i y_i - \sum x_i \sum y_i}{\sqrt{n \sum x_i^2 - (\sum x_i)^2} \sqrt{n \sum y_i^2 - (\sum y_i)^2}},$$
where  $n$  is the number of measurements for each population.
  - c. For gene pairs which have been found to have similar correlations in the 3 datasets, calculate the weighted average correlation, weighted by the number of individuals in each population.  
(Hint: In the [Supplemental Table 1](http://genome.cshlp.org/content/suppl/2009/10/02/gr.097600.109.DC1/nayak_supplemental_material.pdf), published with [98] ([http://genome.cshlp.org/content/suppl/2009/10/02/gr.097600.109.DC1/nayak\\_supplemental\\_material.pdf](http://genome.cshlp.org/content/suppl/2009/10/02/gr.097600.109.DC1/nayak_supplemental_material.pdf)), you can find the list of gene pairs whose correlations differ significantly among the 3 datasets.)  
For every pair of genes ( $x, y$ ), the weighted average correlation can be calculated as follows:
$$r_{xy}^{WA} = \frac{87r_{xy}^{ASN} + 148r_{xy}^{CEPH-Utah} + 60r_{xy}^{YRI}}{(87+148+60)},$$
where 87, 148, 60 are the numbers of samples in each population. However, the gene pairs in the Supplemental Table 1 have significantly different expression correlations among 3 datasets. Thus, these gene pairs should be excluded from the result so that we have the weighted average correlations for 8,968,248 pairs of genes.

---

<sup>1</sup> These authors contributed equally

\* Corresponding author e-mail [przytyck@ncbi.nlm.nih.gov](mailto:przytyck@ncbi.nlm.nih.gov)

- d. Construct the correlation network by connecting gene pairs whose weighted average correlations are greater than the pre-defined threshold (e.g., 0.5).  
After selecting gene pairs whose weighted average correlations exceed the pre-defined threshold (e.g.,  $|r_{xy}^{WA}| > 0.5$ ), import the selected pairs into Cytoscape (File → Import → Network from Table) so that the coexpression network is constructed.
- e. Compute specific parameters describing the network topology.  
(Hint: We can use the [NetworkAnalyzer](http://med.bioinf.mpi-inf.mpg.de/netanalyzer/) Cytoscape plugin <http://med.bioinf.mpi-inf.mpg.de/netanalyzer/>)  
Using NetworkAnalyzer plugin (Plugins → Network Analysis → Analyze Network), we can obtain the following parameters which describe the network topology:
- Clustering coefficient: 0.394
  - Network density: 0.009
  - Network diameter: 11
  - Network heterogeneity: 1.224
  - Network centrality: 0.054
  - Characteristic path length: 3.602
  - Average number of neighbors: 26.969
- f. For the different correlation threshold, compare the networks in terms of topological properties.

| Threshold | Clustering coefficient | Network density | Network diameter | Network heterogeneity | Network centrality | Characteristic path length | Average #neighbors |
|-----------|------------------------|-----------------|------------------|-----------------------|--------------------|----------------------------|--------------------|
| 0.5       | 0.394                  | 0.009           | 11               | 1.224                 | 0.054              | 3.602                      | 26.969             |
| 0.6       | 0.370                  | 0.008           | 18               | 1.606                 | 0.055              | 5.271                      | 11.409             |
| 0.7       | 0.322                  | 0.024           | 21               | 1.822                 | 0.135              | 4.802                      | 11.035             |
| 0.8       | 0.557                  | 0.159           | 5                | 1.015                 | 0.324              | 1.754                      | 18.000             |
| 0.9       | 0.583                  | 0.244           | 4                | 0.718                 | 0.462              | 1.720                      | 7.5625             |

2. Suppose that in a co-expression network two genes are identified to have correlated expression patterns. Provide at least two possible biological explanations of this correlation.
- (i) One gene can be a transcription factor regulating another gene
  - (ii) Both genes are regulated by the same transcription factor.
  - (iii) Members of the same protein complex or pathway are often (directly or indirectly) co-regulated.
3. Some variants of information flow approaches that identify pathways of information flow from a mutated gene to a target gene with correlated expression require that the last but one node gene on such a pathway (the node preceding the target gene) to be a transcription factor. What is a justification for such requirement? What can be advantages and disadvantages of such a design?

It is reasonable to assume that the expression change of a gene is a direct consequence of the activity of a transcription factor. However we don't know transcription factors for most of the human genes which limits applicability of such approach to the human interactive.

4. Consider a set cover approach to find a representative set of genes dys-regulated in a given set of cancer patients. The algorithm finds the smallest number of genes so that each disease case is covered at least  $k$  times. How does the number of selected genes depend on  $k$ ?

Increasing  $k$  will increase the number of genes required for the cover. In particular if there are  $k_1$  genes that are dys-regulated in all patients, then for  $k \leq k_1$  we will get  $k$  of such genes in the covering set. For  $k > k_1$  different samples will have to be covered with different genes so the number of genes needed to cover all cases  $k$  times will be larger than  $k$ .

If you suspect that data for 5% patients might be incorrect, how would you modify the optimization problem?

In such situation, it is reasonable to modify the set cover definition to require that all but 5% of cases are required to be covered  $k$ -times.

5. A Steiner tree connecting a set of nodes does not need to be unique. In Figure 4, Find two different Steiner trees connecting genes C,  $T_1$ ,  $T_2$ ,  $T_3$ ,  $T_4$ .

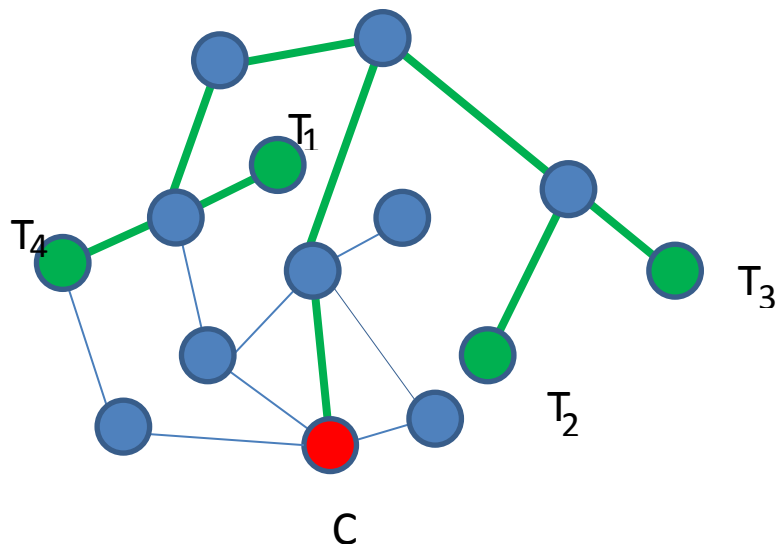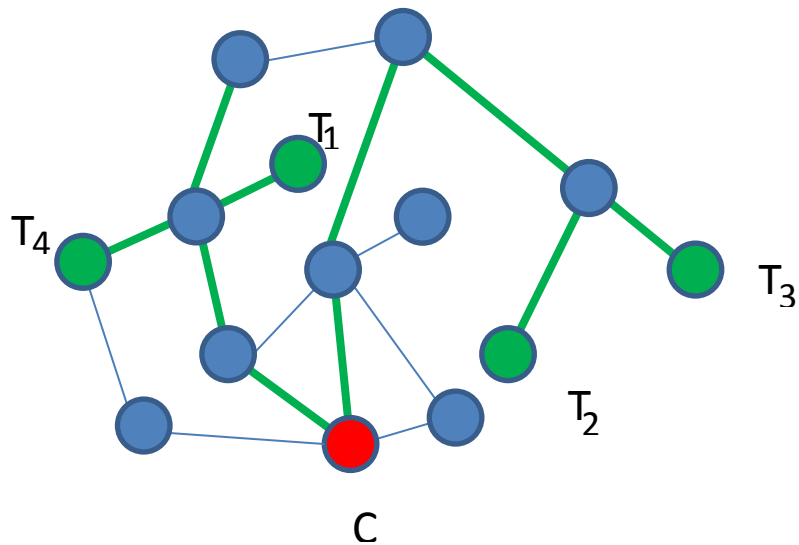

Two Steiner trees connecting genes C,  $T_1$ ,  $T_2$ ,  $T_3$ ,  $T_4$  are shown in green. Both trees use 9 edges.

6. In the graph shown in Figure 4, find the shortest paths connecting  $C$  with  $T_1, T_2, T_3, T_4$ . Do the edges used by these paths correspond to a Steiner tree?

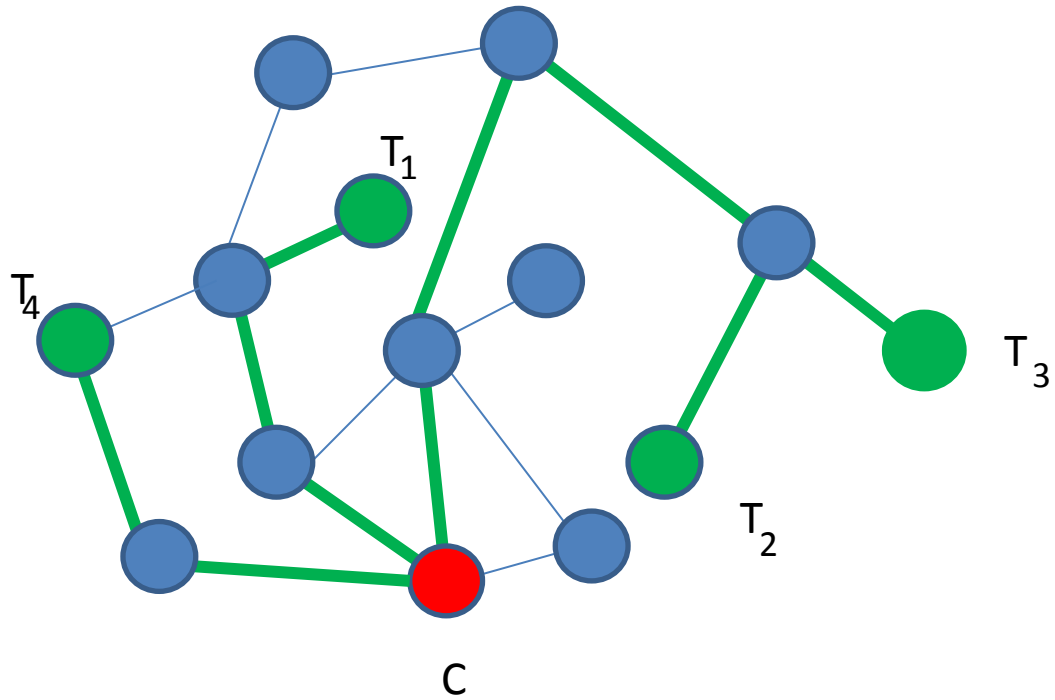

The shortest paths connecting  $C$  with  $T_1, T_2, T_3$ , and  $T_4$  are shown in green. The edges used by these paths do not correspond to a Steiner tree since they do not minimize the number of edges needed to connect all nodes.
